# Supplementary material for: Single cell transcriptomic analyses implicate an immunosuppressive tumor microenvironment in pancreatic cancer liver metastasis
Source: PubMed Central journal article supplement (PMC10447466; doi:10.1038/s41467-023-40727-7), 2023-08-23
Supplement: 41467_2023_40727_MOESM2_ESM.pdf [file 41467_2023_40727_MOESM2_ESM.pdf]

## **Description of Additional Supplementary Files**

### Supplementary Data 1

The differentially expressed genes across cell clusters in the integrated cell map. Relevant to Figure 1 and Supplementary Figure 1.

### Supplementary Data 2

The differentially expressed genes across cell subtypes of ductal cells. Relevant to Figure 2 and Supplementary Figure 2.

### Supplementary Data 3

The pathways enriched in cell states of ductal cells by GSEA analyses. Relevant to Supplementary Figure 5.

### Supplementary Data 4

The differentially expressed genes across cell subtypes of stromal cells (including fibroblasts, endothelial cells, endocrine cells and acinar cells). Relevant to Supplementary Figure 7.

### Supplementary Data 5

The differentially expressed genes across cell subtypes of myeloid cells. Relevant to Figure 5 and Supplementary Figure 10.

### Supplementary Data 6

The pathways enriched in cell subtypes of myeloid cells by GSEA analyses. Relevant to Supplementary Figure 10.

### Supplementary Data 7

The differentially expressed genes across cell subtypes of lymphoid cells. Relevant to Figure 6.
